# Supplementary material
Source: MDPI journal article supplement (https://www.mdpi.com/2076-3417/12/6/3062)
Supplement: s1 [file s1 › applsci-1630038-supplementary.pdf]

## Supplementary Data:

### Series 1

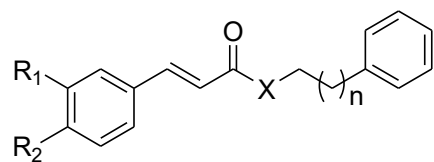

- 1:**  $R_1 = R_2 = \text{OH}$ ;  $X = \text{O}$ ;  $n = 2$   
**2:**  $R_1 = R_2 = \text{OH}$ ;  $X = \text{O}$ ;  $n = 3$   
**3:**  $R_1 = R_2 = \text{OH}$ ;  $X = \text{O}$ ;  $n = 4$   
**4:**  $R_1 = R_2 = \text{OH}$ ;  $X = \text{O}$ ;  $n = 5$   
**5:**  $R_1 = R_2 = \text{OH}$ ;  $X = \text{NH}$ ;  $n = 2$   
**6:**  $R_1 = R_2 = \text{OH}$ ;  $X = \text{NH}$ ;  $n = 3$

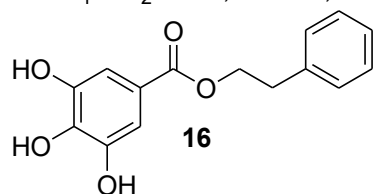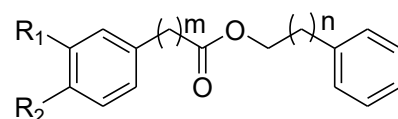

- 7:**  $R_1 = R_2 = \text{OH}$ ;  $m = 2$ ;  $n = 1$   
**8:**  $R_1 = R_2 = \text{OH}$ ;  $m = 2$ ;  $n = 2$   
**9:**  $R_1 = R_2 = \text{OH}$ ;  $m = 2$ ;  $n = 3$   
**10:**  $R_1 = R_2 = \text{OH}$ ;  $m = 2$ ;  $n = 4$   
**11:**  $R_1 = R_2 = \text{OH}$ ;  $m = 2$ ;  $n = 5$   
**12:**  $R_1 = R_2 = \text{OH}$ ;  $m = 1$ ;  $n = 1$   
**13:**  $R_1 = R_2 = \text{OH}$ ;  $m = 1$ ;  $n = 2$   
**14:**  $R_1 = R_2 = \text{OH}$ ;  $m = 0$ ;  $n = 1$   
**15:**  $R_1 = R_2 = \text{OH}$ ;  $m = 0$ ;  $n = 2$

Figure S1A

Table S1A

| Compound | FRAP ( $\mu\text{mol TE/L}$ ) | ORAC ( $\mu\text{mol TE/L}$ ) | ABTS ( $\mu\text{mol TE/L}$ ) |
|----------|-------------------------------|-------------------------------|-------------------------------|
| 1        | 188.3 $\pm$ 6.9               | 368.3 $\pm$ 12.3              | 427.9 $\pm$ 44.9              |
| 2        | 204.2 $\pm$ 3.6               | 404.9 $\pm$ 1.7               | 464.7 $\pm$ 13.5              |
| 3        | 200.0 $\pm$ 7.0               | 388.0 $\pm$ 7.3               | 469.8 $\pm$ 19.1              |
| 4        | 199.8 $\pm$ 2.9               | 398.9 $\pm$ 3.3               | 446.3 $\pm$ 0.3               |
| 5        | 176.0 $\pm$ 3.4               | 361.7 $\pm$ 12.3              | 435.6 $\pm$ 31.2              |
| 6        | 156.3 $\pm$ 1.5               | 334.6 $\pm$ 9.7               | 417.0 $\pm$ 20.7              |
| 7        | 191.2 $\pm$ 4.4               | 462.9 $\pm$ 11.2              | 475.7 $\pm$ 23.8              |
| 8        | 182.4 $\pm$ 6.0               | 464.4 $\pm$ 8.5               | 420.2 $\pm$ 31.5              |

|    |                  |                   |                  |
|----|------------------|-------------------|------------------|
| 9  | 173.2±5.8        | 325.1±8.1         | 372.7±14.4       |
| 10 | 192.7±8.6        | 343.2±3.2         | 452.1±34.8       |
| 11 | 168.3±3.2        | 343.1±9.5         | 463.8±5.3        |
| 12 | <b>373.5±9.2</b> | <b>420.8±11.3</b> | <b>522.7±0.4</b> |
| 13 | 368.2±12.5       | 309.5±6.1         | 490.5±26.3       |
| 14 | 266.0±10.6       | 392.2±5.3         | 489.3±41.2       |
| 15 | 277.0±7.9        | 415.3±14.5        | 502.9±29.7       |
| 16 | <b>314.8±6.5</b> | <b>336.3±2.1</b>  | <b>522.6±1.3</b> |

## Series 2

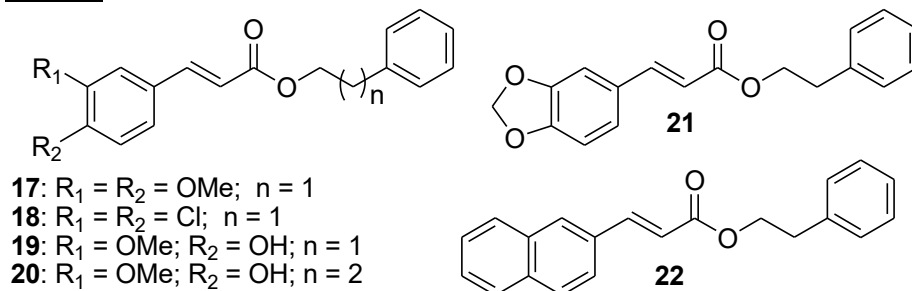

Figure S1B

Table S1B

| Compound | FRAP ( $\mu\text{mol TE/L}$ ) | ORAC ( $\mu\text{mol TE/L}$ ) | ABTS ( $\mu\text{mol TE/L}$ ) |
|----------|-------------------------------|-------------------------------|-------------------------------|
| 16       | 314.8 $\pm$ 6.5               | 336.3 $\pm$ 2.1               | 522.6 $\pm$ 1.3               |
| 17       | 50.6 $\pm$ 0.5                | 162.5 $\pm$ 2.0               | 142.3 $\pm$ 12.5              |
| 18       | 58.0 $\pm$ 1.0                | 153.3 $\pm$ 1.8               | 207.5 $\pm$ 20.0              |
| 19       | 161.2 $\pm$ 8.0               | 283.3 $\pm$ 5.2               | 357.3 $\pm$ 38.8              |
| 20       | 170.6 $\pm$ 5.7               | 321.4 $\pm$ 9.8               | 360.0 $\pm$ 33.3              |
| 21       | 50.3 $\pm$ 0.5                | 226.0 $\pm$ 8.4               | 221.7 $\pm$ 20.3              |
| 22       | 64.5 $\pm$ 1.6                | 145.9 $\pm$ 2.6               | 163.3 $\pm$ 10.8              |

### Series 3

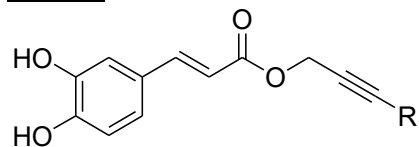

**23:** R = H

**24:** R = Ph

**25:** R = CH<sub>2</sub>CH<sub>2</sub>PhMe(4-Me)

**26:** R = CH<sub>2</sub>CH<sub>2</sub>PhOMe(4-OMe)

**27:** R = CH<sub>2</sub>CH<sub>2</sub>Ph(4-NO<sub>2</sub>)

**28:** R = CH<sub>2</sub>CH<sub>2</sub>PhF(4-F)

**29:** R = CH<sub>2</sub>CH<sub>2</sub>Naph (1-)

**30:** R = CH<sub>2</sub>CH<sub>2</sub>PhPh

**31:** R = 4'-(CCCH<sub>2</sub>Caffeoyl)-Ph

**Figure S1C**

**Table S1C**

| Compound | FRAP (μmol TE/L) | ORAC (μmol TE/L) | ABTS (μmol TE/L) |
|----------|------------------|------------------|------------------|
| 23       | 201.3±6.8        | 368.3±12.3       | 461.7±41.8       |
| 24       | 187.9±5.9        | 162.5±2.0        | 462.0±38.9       |
| 25       | 191.0±8.2        | 153.3±1.8        | 477.2±24.7       |
| 26       | <b>287.6±2.7</b> | <b>226.0±8.4</b> | <b>486.0±4.4</b> |
| 27       | 192.0±3.1        | 223.0±4.2        | 423.9±32.6       |
| 28       | 206.5±11.0       | 145.9±2.6        | 494.9±27.3       |
| 29       | 188.5±1.8        | 283.3±5.2        | 442.8±30.3       |
| 30       | 142.3±1.8        | 321.4±9.8        | 376.0±21.6       |
| 31       | 191.5±11.0       | 336.3±2.1        | 455.5±29.6       |

#### Series 4

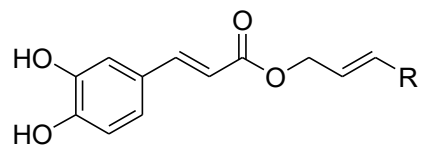

**32:** R = H

**33:** R = Ph

**34:** R = CH<sub>2</sub>CH<sub>2</sub>PhMe(4-Me)

**35:** R = CH<sub>2</sub>CH<sub>2</sub>PhOMe(4-OMe)

**36:** R = CH<sub>2</sub>CH<sub>2</sub>Ph(4-NO<sub>2</sub>)

**37:** R = CH<sub>2</sub>CH<sub>2</sub>PhF(4-F)

**38:** R = CH<sub>2</sub>CH<sub>2</sub>Naph (1-)

**39:** R = CH<sub>2</sub>CH<sub>2</sub>PhPh

**40:** R = 4'-(CCCH<sub>2</sub>Caffeoyl)-Ph

**Figure S1D**

**Table S1D**

| Compound | FRAP (μmol TE/L) | ORAC (μmol TE/L)  | ABTS (μmol TE/L)  |
|----------|------------------|-------------------|-------------------|
| 32       | 199.4±5.4        | 379.6±3.3         | 501.8±16.1        |
| 33       | 211.3±5.0        | 394.5±2.7         | 502.3±15.8        |
| 34       | 313.3±1.2        | 421.5±5.2         | 512.6±10.0        |
| 35       | <b>302.6±6.6</b> | <b>459.2±15.3</b> | <b>509.7±18.1</b> |
| 36       | 207.1±7.7        | 367.2±8.6         | 484.2±5.4         |
| 37       | 232.9±12.0       | 388.3±6.3         | 491.9±12.9        |
| 38       | 220.7±7.0        | 323.9±2.0         | 476.5±10.5        |
| 39       | 201.8±3.1        | 292.0±2.9         | 415.1±10.4        |
| 40       | 329.1±20.0       | 281.0±14.6        | 486.2±15.1        |

### Series 5

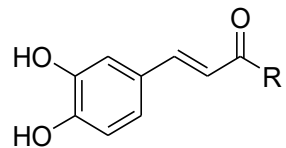

**41:** R = H

**42:** R = Ph

**43:** R = CH<sub>2</sub>Ph

**44:** R = CH<sub>2</sub>CH<sub>2</sub>Ph

**45:** R = CH<sub>2</sub>CH<sub>2</sub>CH<sub>2</sub>Ph

**Figure S1E**

**Table S1E**

| Compound | FRAP (μmol TE/L)  | ORAC (μmol TE/L) | ABTS (μmol TE/L) |
|----------|-------------------|------------------|------------------|
| 41       | 258.9±12.7        | 420.8±11.3       | 524.9±1.8        |
| 42       | <b>222.1±13.8</b> | <b>444.3±1.1</b> | <b>511.1±1.0</b> |
| 43       | 234.7±3.2         | 432.5±8.8        | 510.5±12.3       |
| 44       | <b>231.3±3.5</b>  | <b>438.4±2.8</b> | <b>517.4±6.4</b> |
| 45       | 232.3±5.8         | 386.0±13.6       | 502.1±19.1       |

### Series 6

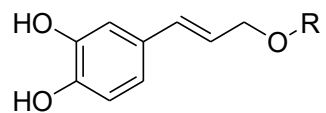

**46:** R = H

**47:** R = CH<sub>2</sub>Ph

**48:** R = CH<sub>2</sub>CH<sub>2</sub>CH<sub>2</sub>Ph

Figure S1F

Table S1F

| Compound | FRAP (μmol TE/L) | ORAC (μmol TE/L) | ABTS (μmol TE/L) |
|----------|------------------|------------------|------------------|
| 46       | 238.8±8.3        | 376.2±11.6       | 524.4±1.4        |
| 47       | 250.7±10.0       | 368.5±14.9       | 405.3±28.5       |
| 48       | 243.6±10.0       | 371.2±14.9       | 415.3±35.4       |

## Standards

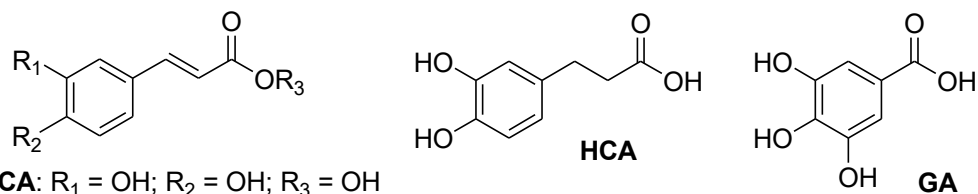

**CA:**  $\text{R}_1 = \text{OH}$ ;  $\text{R}_2 = \text{OH}$ ;  $\text{R}_3 = \text{OH}$

**FA:**  $\text{R}_1 = \text{OCH}_3$ ;  $\text{R}_2 = \text{OH}$ ;  $\text{R}_3 = \text{OH}$

**CAPE:**  $\text{R}_1 = \text{OH}$ ;  $\text{R}_2 = \text{OH}$ ;  $\text{R}_3 = \text{CH}_2\text{CH}_2\text{Ph}$

| Internal Standards              | FRAP ( $\mu\text{mol TE/L}$ ) | ORAC ( $\mu\text{mol TE/L}$ ) | ABTS ( $\mu\text{mol TE/L}$ ) |
|---------------------------------|-------------------------------|-------------------------------|-------------------------------|
| Caffeic acid (CA)               | 944.5 $\pm$ 17.7              | 473.1 $\pm$ 3.3 $\pm$         | 526.1 $\pm$ 1.4               |
| dihydrocaffeic acid (HCA)       | 406.5 $\pm$ 13.8              | 468.2 $\pm$ 5.3               | 500.8 $\pm$ 11.7              |
| CAPE                            | 560.9 $\pm$ 21.1              | 372.0 $\pm$ 4.0 $\pm$         | 500.4 $\pm$ 4.3               |
| Gallic acid (GA)                | 195.3 $\pm$ 6.4               | 251.0 $\pm$ 2.7 $\pm$         | 495.4 $\pm$ 11.0              |
| Ferulic acid (FA)               | 270.3 $\pm$ 9.9               | 305.0 $\pm$ 5.4 $\pm$         | 424.7 $\pm$ 15.4              |
| (2-Naphthyl)-acrylic acid (NAA) | 48.3 $\pm$ 0.5                | 223.0 $\pm$ 4.2               | 122.2 $\pm$ 8.2               |

**Figure S1: Figures and tables showing detailed antioxidant activity and chemical characteristics of Caffeic acid and CAPE analogs (100  $\mu\text{M}$ ) as measured using ABTS, FRAP, and ORAC antioxidant assays.**

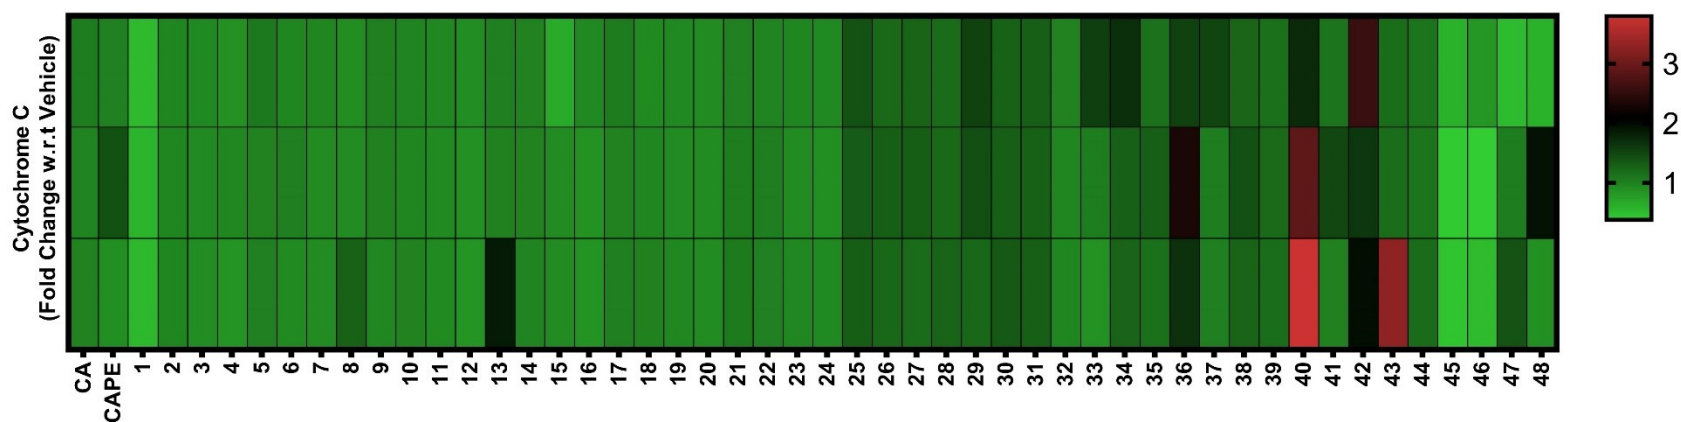

**Figure S2: The impact of Caffeic acid and CAPE analogs on cytochrome C levels as the toxicity indicator.** WI-38 cells were pre-treated with 10  $\mu$ M of the selected compounds for 24 hours and then the cytochrome C levels were measured using ELISA.

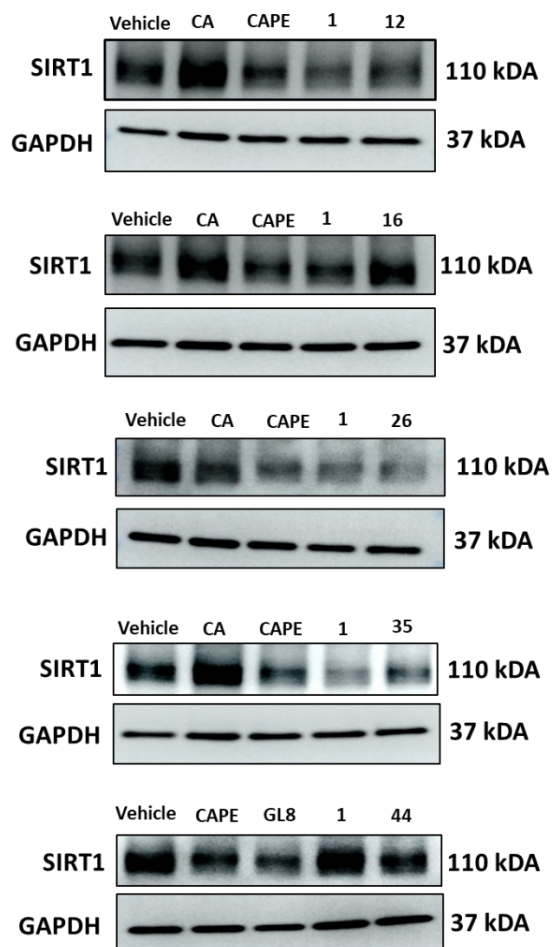

**Figure S3: The impact of Caffeic acid and CAPE analogs on SIRT1 levels.** 293T cells were pre-treated with 10  $\mu$ M of the selected compounds for 24 hours and then the selected biomarkers were observed using western blot.

**A**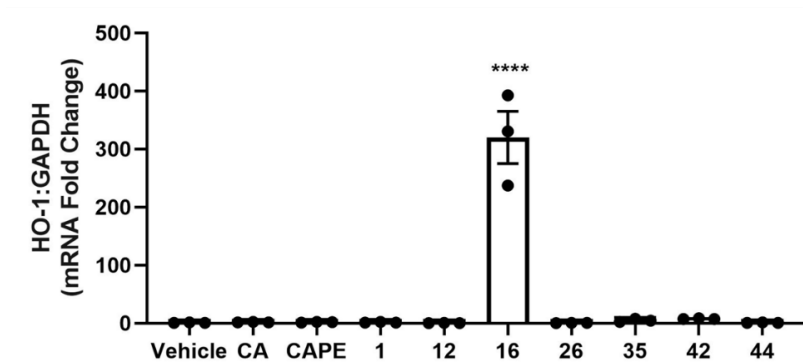**B**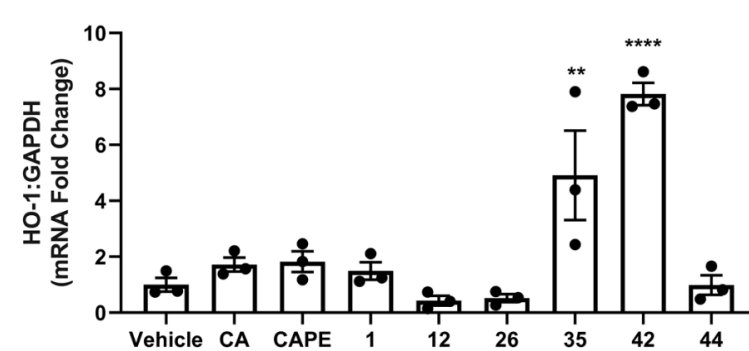**C**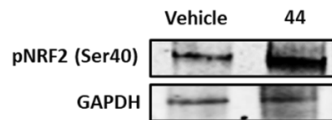

**Figure S4: The impact of Caffeic acid and CAPE analogs on Nrf2 pathway activation.** 293T cells were pre-treated with 10  $\mu$ M of the selected compounds for 24 hours and then the protein and RNA were extracted using RIPA buffer and TRIZOL. (A-B) mRNA increase in HO-1 and (C) validation of p-NRF2 by analog 44. Ordinary one-way analysis of variance (ANOVA) was performed followed by Dunnett's multiple comparisons test to identify statistical difference \*\* $p < 0.01$ , \*\*\*\* $p < 0.0001$ .

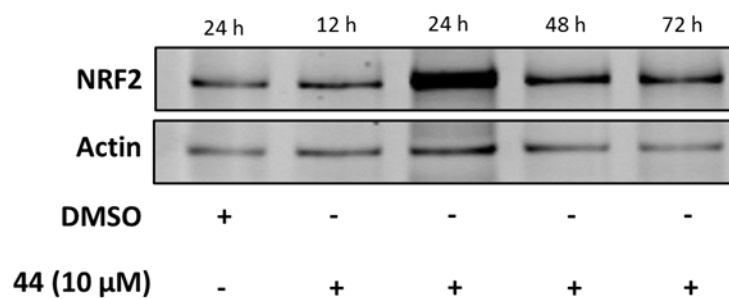

**Figure S5: The subcellular localization of Nrf2 following treatment with compound 44, the ketone analog of CAPE.** 293T cells were pre-treated with 10  $\mu$ M of the compound 44 for 24 hours and then the nuclear protein was extracted, and immunoblotting was performed.

# Additional Supplementary Material: NMR data

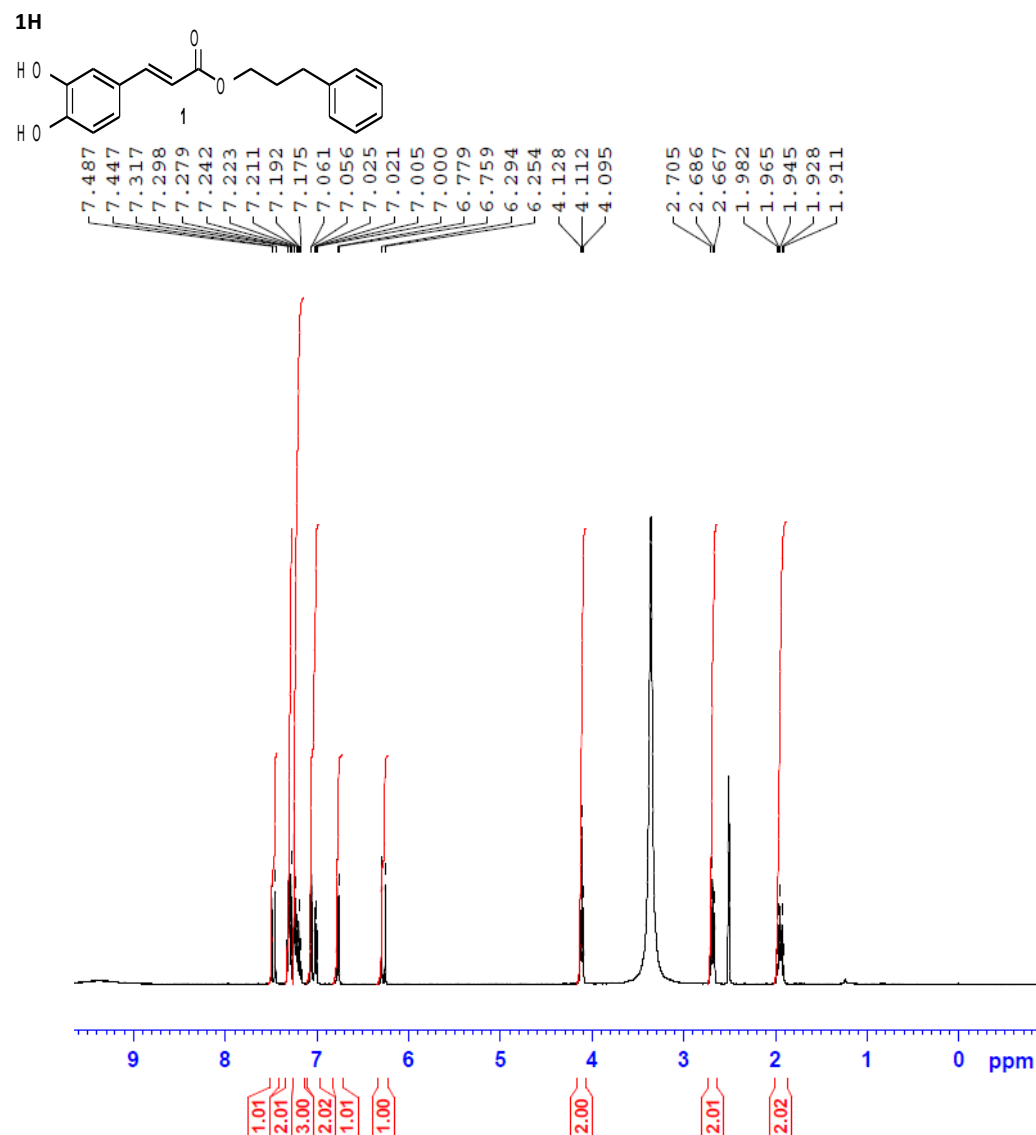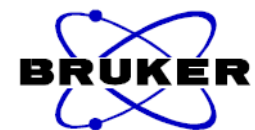

```

NAME           Moh RX
EXPNO          186
PROCNO         1
Date_          20130516
Time           14.03
INSTRUM        spect
PROBHD         5 mm PABBO BB-
PULPROG        zg30
TD             65536
SOLVENT        DMSO
NS             16
DS             2
SWH            8223.685 Hz
FIDRES         0.125483 Hz
AQ             3.9846387 sec
RG             90.5
DW             60.800 usec
DE             6.50 usec
TE             298.0 K
D1             1.00000000 sec
TD0            1
  
```

```

===== CHANNEL f1 =====
NUC1           1H
P1             14.07 usec
PL1            0.30 dB
PL1W           11.25229836 W
SFO1           400.1324710 MHz
SI             32768
SF             400.1300000 MHz
WDW            EM
SSB            0
LB             0.30 Hz
GB             0
PC             1.00
  
```

**13C**

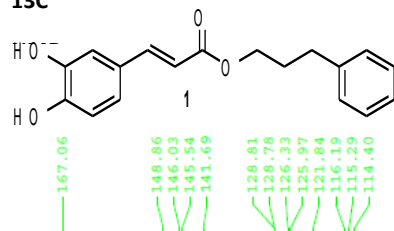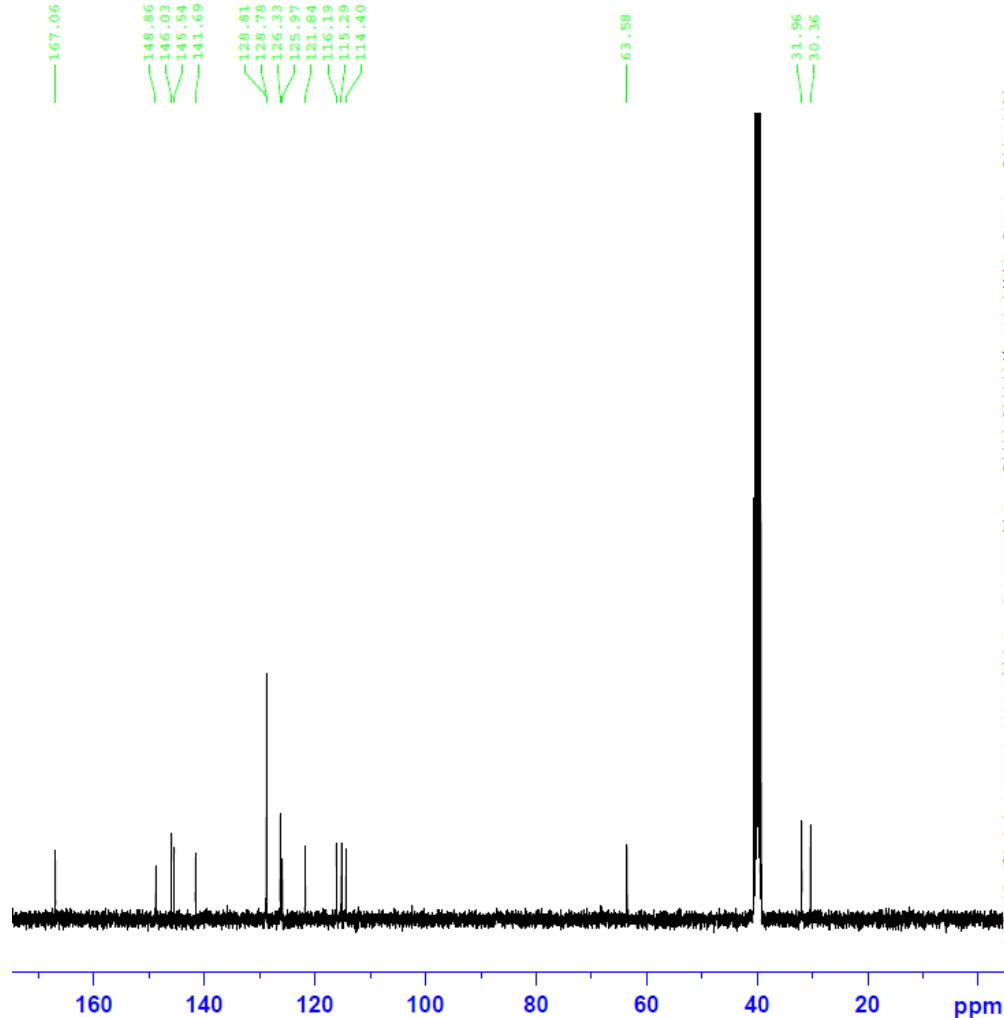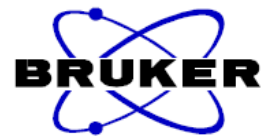

NAME Moh RX  
 EXPNO 187  
 PROCNO 1  
 Date\_ 20130516  
 Time 14.50  
 INSTRUM spect  
 PROBHD 5 mm PABBO BB-  
 PULPROG zgpg30  
 TD 65536  
 SOLVENT DMSO  
 NS 715  
 DS 4  
 SWH 24038.461 Hz  
 FIDRES 0.366798 Hz  
 AQ 1.3631988 sec  
 RG 203  
 DW 20.800 usec  
 DE 6.50 usec  
 TE 298.0 K  
 D1 2.00000000 sec  
 D11 0.03000000 sec  
 TD0 1

===== CHANNEL f1 =====  
 NUC1 13C  
 P1 9.90 usec  
 PL1 -1.90 dB  
 PL1W 56.02249908 W  
 SFO1 100.6228298 MHz

===== CHANNEL f2 =====  
 CPDPRG2 waltz65  
 NUC2 1H  
 PCPD2 80.00 usec  
 PL2 0.30 dB  
 PL12 15.40 dB  
 PL13 18.40 dB  
 PL2W 11.25229836 W  
 PL12W 0.34772930 W  
 PL13W 0.17427748 W  
 SFO2 400.1316005 MHz  
 SI 32768  
 SF 100.6127690 MHz  
 WDW EM  
 SSB 0  
 LB 1.00 Hz  
 GB 0  
 PC 1.40

<sup>1</sup>H

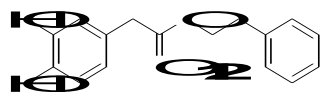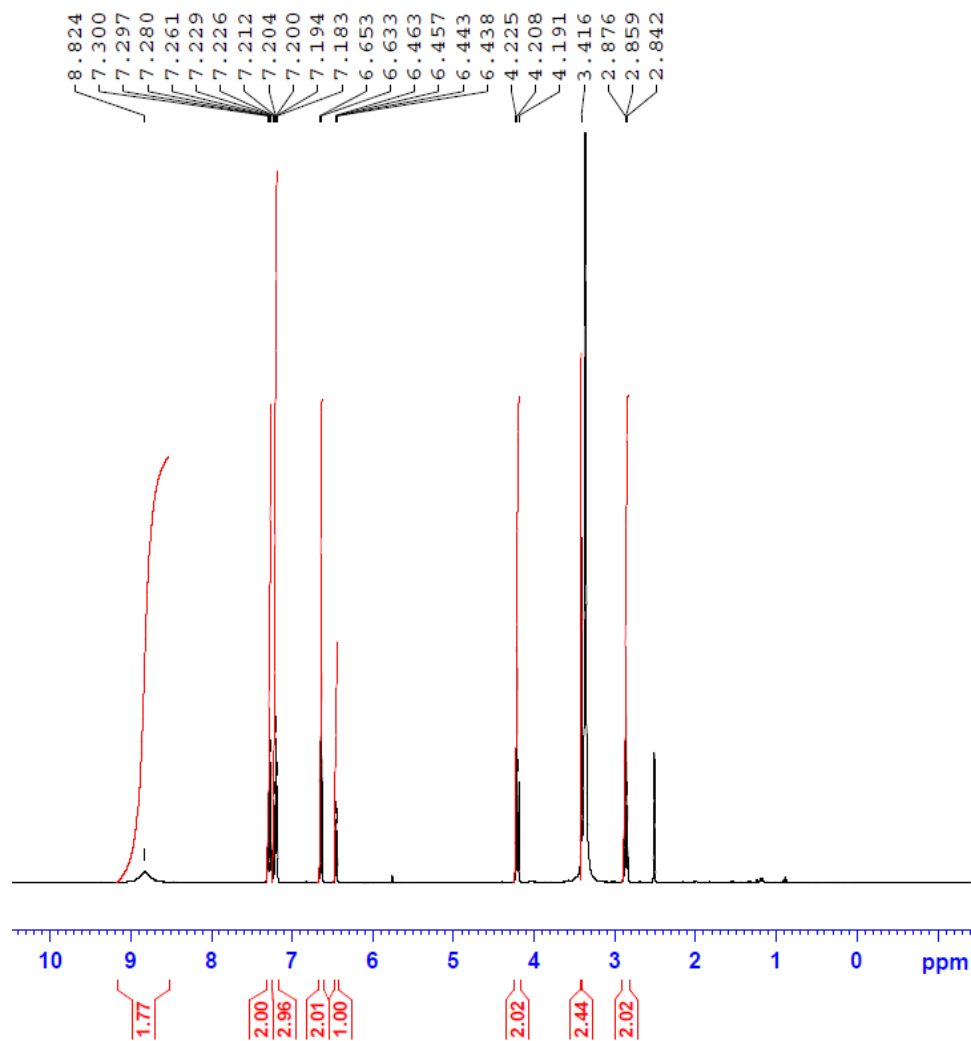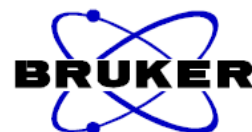

```

NAME           Moh RX
EXPNO          21
PROCNO         1
Date_          20140530
Time           9.22
INSTRUM        spect
PROBHD         5 mm PABBO BB-
PULPROG        zg30
TD             65536
SOLVENT        DMSO
NS             16
DS             2
SWH            8223.685 Hz
FIDRES         0.125483 Hz
AQ            3.9846387 sec
RG             80.6
DW            60.800 usec
DE             6.50 usec
TE            298.0 K
D1            1.00000000 sec
TD0            1
  
```

```

===== CHANNEL f1 =====
NUC1            1H
P1            14.07 usec
PL1             0.30 dB
PL1W          11.25229836 W
SFO1          400.1324710 MHz
SI            32768
SF            400.1300000 MHz
WDW            EM
SSB            0
LB            0.30 Hz
GB            0
PC            1.00
  
```

**<sup>13</sup>C NMR**

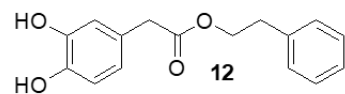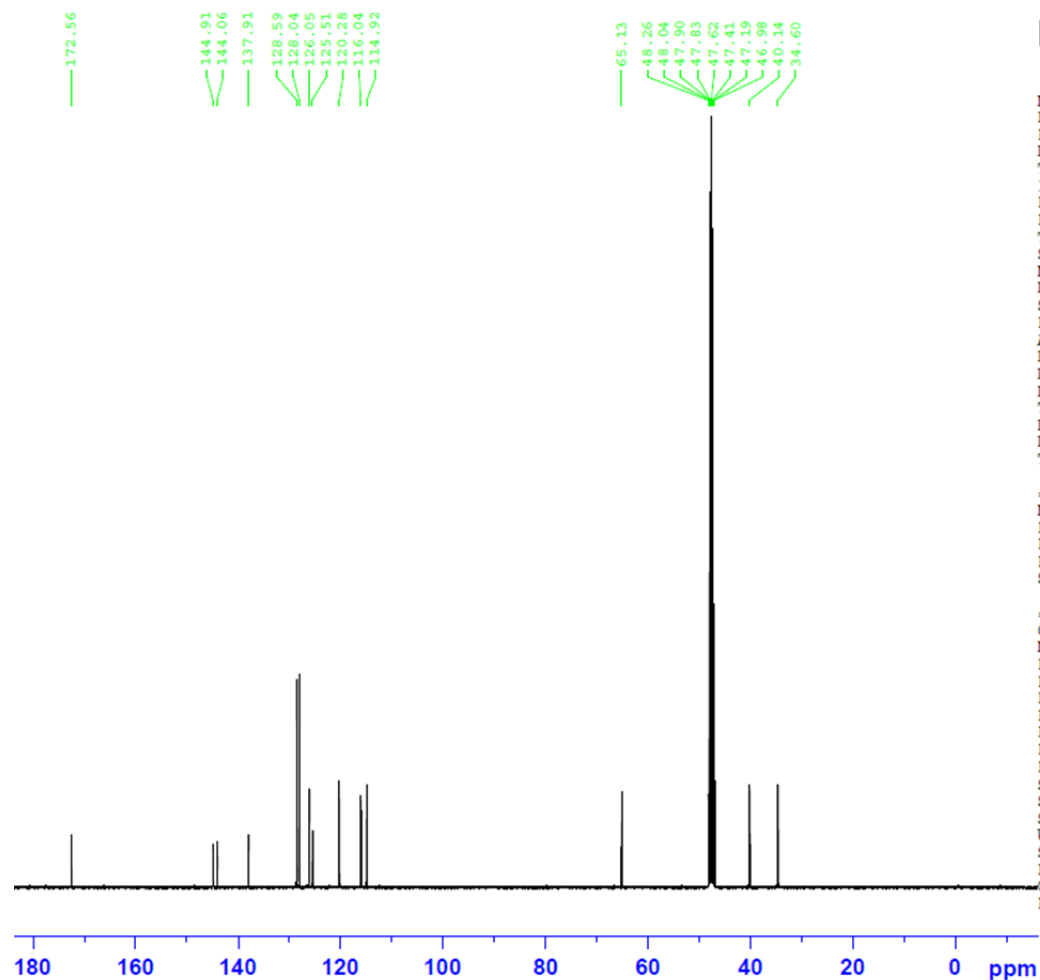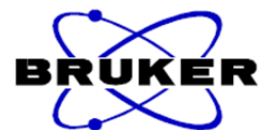

NAME Luc  
EXPNO 164  
PROCNO 1  
Date\_ 20120430  
Time 10.07  
INSTRUM spect  
PROBHD 5 mm PABBO BB-  
PULPROG zgpg30  
TD 65536  
SOLVENT MeOD  
NS 839  
DS 4  
SWH 24038.461 Hz  
FIDRES 0.366798 Hz  
AQ 1.3631988 sec  
RG 203  
DW 20.800 usec  
DE 6.50 usec  
TE 298.0 K  
D1 2.00000000 sec  
D11 0.03000000 sec  
TD0 1

===== CHANNEL f1 =====  
NUC1 13C  
P1 9.90 usec  
PL1 -1.90 dB  
PL1W 56.02249908 W  
SFO1 100.6228298 MHz

===== CHANNEL f2 =====  
CPDPRG2 waltz65  
NUC2 1H  
PCPD2 80.00 usec  
PL2 0.30 dB  
PL12 15.40 dB  
PL13 18.40 dB  
PL2W 11.25229836 W  
PL12W 0.34772930 W  
PL13W 0.17427748 W  
SFO2 400.1316005 MHz  
SI 32768  
SF 100.6127690 MHz  
WDW EM  
SSB 0  
LB 1.00 Hz  
GB 0  
PC 1.40

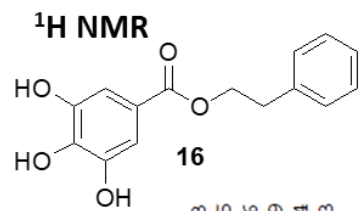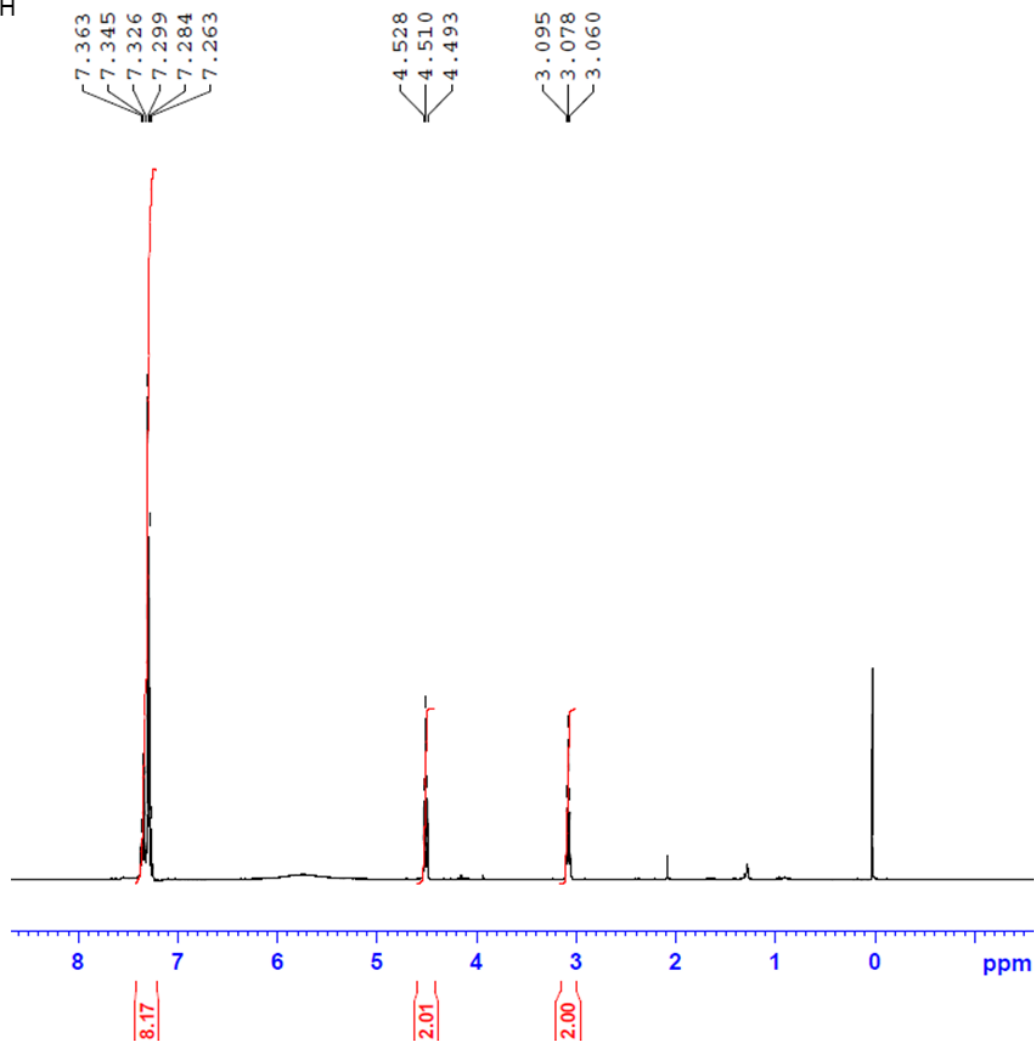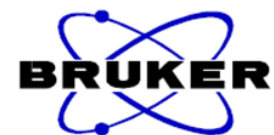

NAME Moh RX  
EXPNO 183  
PROCNO 1  
Date\_ 20130205  
Time 10.02  
INSTRUM spect  
PROBHD 5 mm PABBO BB-  
PULPROG zg30  
TD 65536  
SOLVENT CDCl3  
NS 16  
DS 2  
SWH 8223.685 Hz  
FIDRES 0.125483 Hz  
AQ 3.9846387 sec  
RG 144  
DW 60.800 usec  
DE 6.50 usec  
TE 298.1 K  
D1 1.00000000 sec  
TD0 1

===== CHANNEL f1 =====  
NUC1 1H  
P1 14.07 usec  
PL1 0.30 dB  
PL1W 11.25229836 W  
SFO1 400.1324710 MHz  
SI 32768  
SF 400.1300000 MHz  
WDW EM  
SSB 0  
LB 0.30 Hz  
GB 0  
PC 1.00

**<sup>13</sup>C NMR**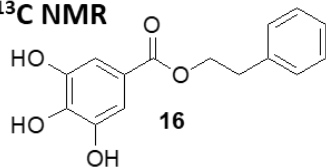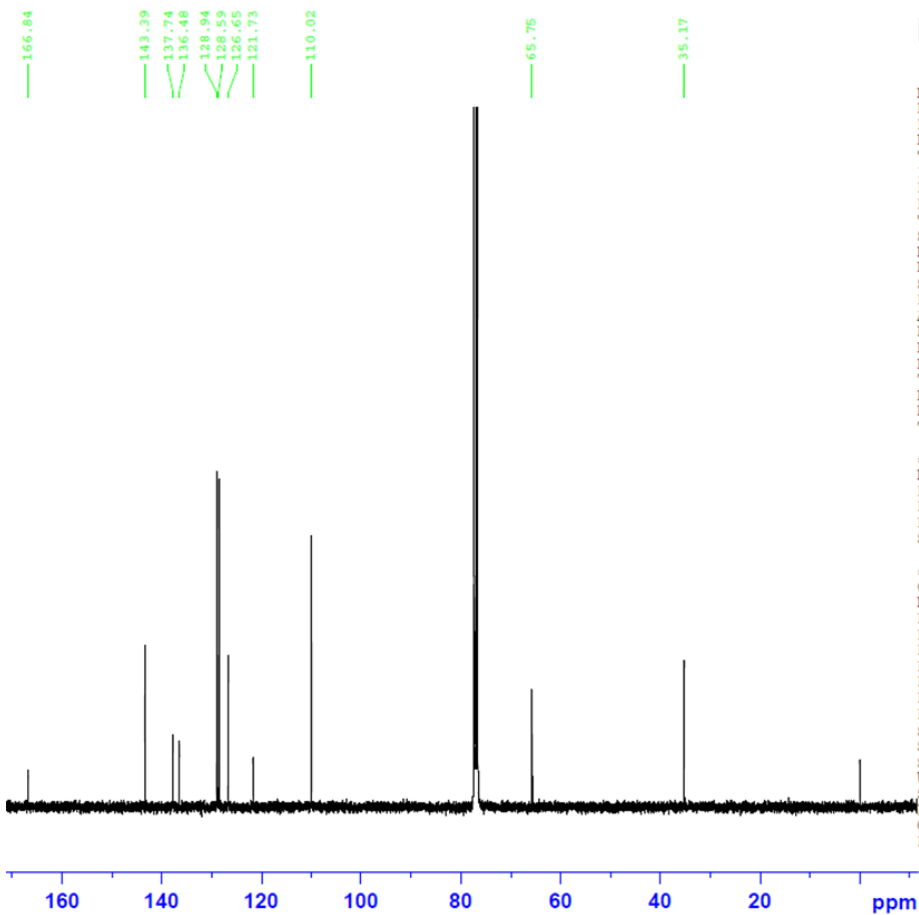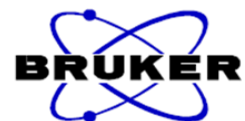

NAME Moh RX  
EXPNO 184  
PROCNO 1  
Date\_ 20130205  
Time 14.27  
INSTRUM spect  
PROBHD 5 mm PABBO BB-  
PULPROG zgpg30  
TD 65536  
SOLVENT CDCl3  
NS 4567  
DS 4  
SWH 24038.461 Hz  
FIDRES 0.366798 Hz  
AQ 1.3631988 sec  
RG 203  
DW 20.800 usec  
DE 6.50 usec  
TE 298.0 K  
D1 2.00000000 sec  
D11 0.03000000 sec  
TD0 1

===== CHANNEL f1 =====  
NUC1 13C  
P1 9.90 usec  
PL1 -1.90 dB  
PL1W 56.02249908 W  
SFO1 100.6228298 MHz

===== CHANNEL f2 =====  
CPDPRG2 waltz65  
NUC2 1H  
PCPD2 80.00 usec  
PL2 0.30 dB  
PL12 15.40 dB  
PL13 18.40 dB  
PL2W 11.25229836 W  
PL12W 0.34772930 W  
PL13W 0.17427748 W  
SFO2 400.1316005 MHz  
SI 32768  
SF 100.6127690 MHz  
WDW EM  
SSB 0  
LB 1.00 Hz  
GB 0  
PC 1.40

**<sup>1</sup>H NMR**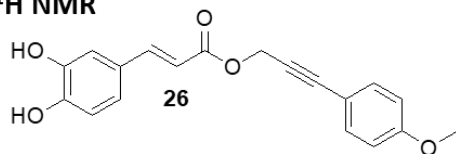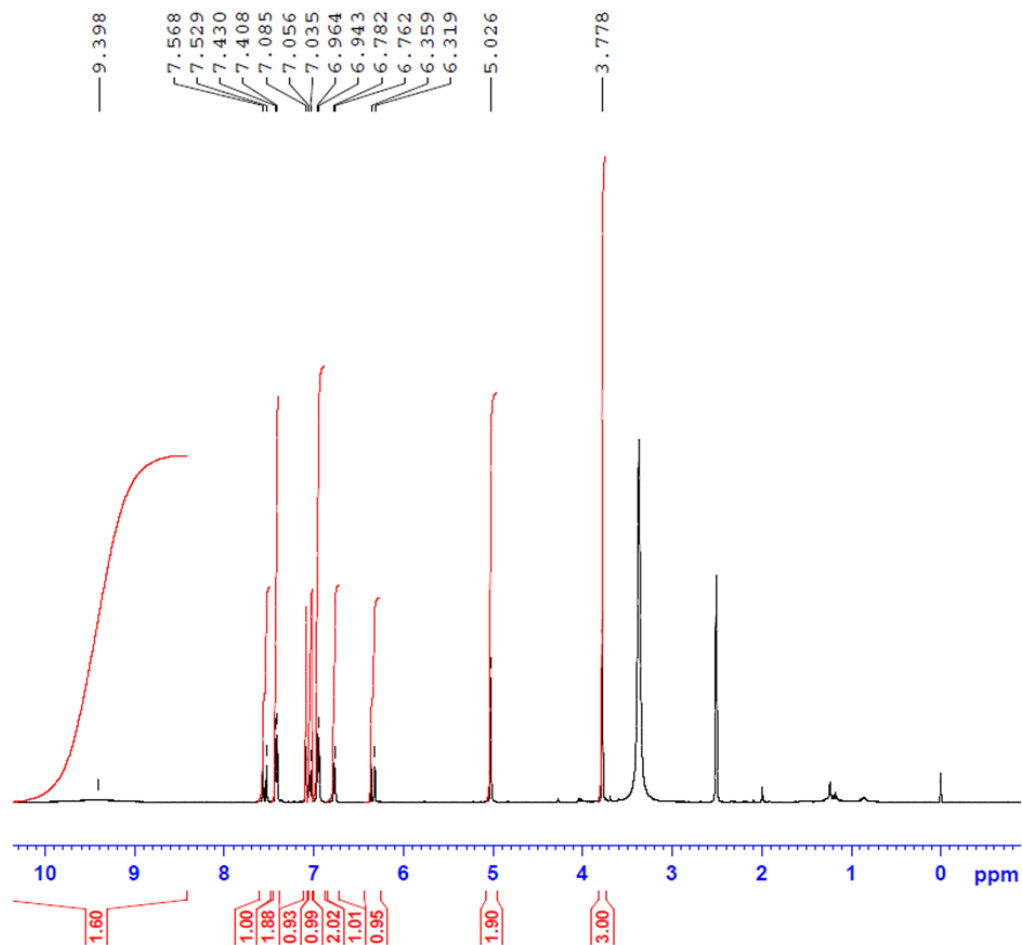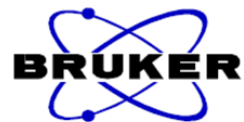

NAME Jeremie  
EXPNO 291  
PROCNO 1  
Date\_ 20110401  
Time\_ 11.22  
INSTRUM spect  
PROBHD 5 mm PABBO BB-  
PULPROG zg30  
TD 65536  
SOLVENT DMSO  
NS 16  
DS 2  
SWH 8223.685 Hz  
FIDRES 0.125483 Hz  
AQ 3.9846387 sec  
RG 90.5  
DW 60.800 usec  
DE 6.50 usec  
TE 293.9 K  
D1 1.00000000 sec  
TD0 1

===== CHANNEL f1 =====  
NUC1 1H  
P1 14.07 usec  
PL1 0.30 dB  
PL1W 11.25229836 W  
SFO1 400.1324710 MHz  
SI 32768  
SF 400.1300000 MHz  
WDW EM  
SSB 0  
LB 0.30 Hz  
GB 0  
PC 1.00

**<sup>13</sup>C NMR**

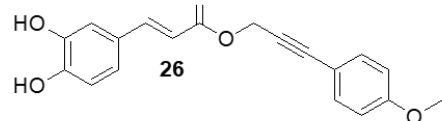

166.40  
160.19  
149.13  
146.58  
146.04  
133.67  
125.84  
122.15  
116.18  
115.39  
114.83  
113.81  
113.52  
86.19  
83.39  
55.72  
52.70

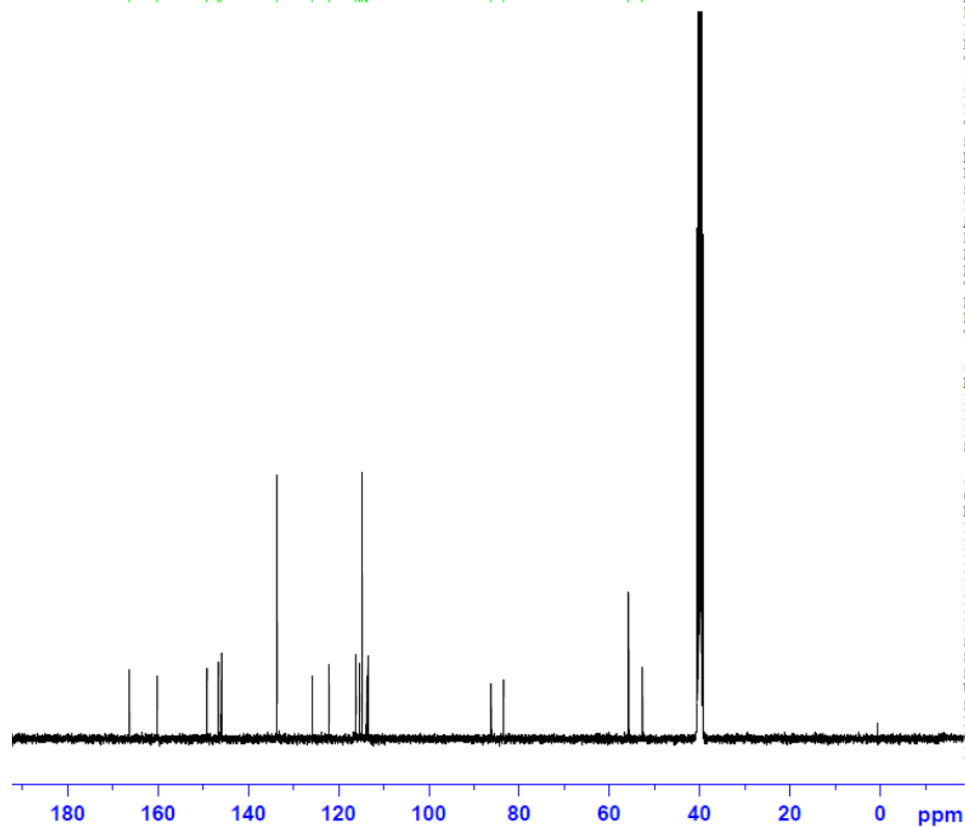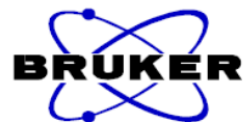

NAME Jeremie  
EXPNO 292  
PROCNO 1  
Date\_ 20110401  
Time 15.24  
INSTRUM spect  
PROBHD 5 mm PABBO BB-  
PULPROG zgpg30  
TD 65536  
SOLVENT DMSO  
NS 4096  
DS 4  
SWH 24038.461 Hz  
FIDRES 0.366798 Hz  
AQ 1.3631988 sec  
RG 203  
DW 20.800 usec  
DE 6.50 usec  
TE 295.5 K  
D1 2.00000000 sec  
D11 0.03000000 sec  
TD0 1

===== CHANNEL f1 =====  
NUC1 13C  
P1 9.90 usec  
PL1 -1.90 dB  
PL1W 56.02249908 W  
SFO1 100.6228298 MHz

===== CHANNEL f2 =====  
CPDPRG2 waltz65  
NUC2 1H  
PCPD2 80.00 usec  
PL2 0.30 dB  
PL12 15.40 dB  
PL13 18.40 dB  
PL2W 11.25229836 W  
PL12W 0.34772930 W  
PL13W 0.17427748 W  
SFO2 400.1316005 MHz  
SI 32768  
SF 100.6127690 MHz  
WDW EM  
SSB 0  
LB 1.00 Hz  
GB 0  
PC 1.40

<sup>1</sup>H NMR

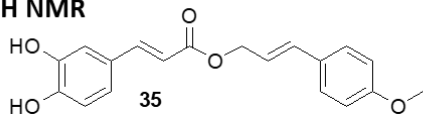

7.538  
7.498  
7.442  
7.434  
7.412  
7.072  
7.067  
7.031  
7.026  
7.011  
7.006  
6.933  
6.926  
6.904  
6.778  
6.758  
6.690  
6.650  
6.332  
6.309  
6.293  
6.277  
6.269  
6.253  
6.238  
4.785  
4.770  
3.762

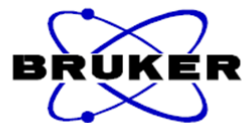

NAME Jeremie  
EXPNO 631  
PROCNO 1  
Date\_ 20120803  
Time\_ 10.25  
INSTRUM spect  
PROBHD 5 mm PABBO BB-  
PULPROG zg30  
TD 65536  
SOLVENT DMSO  
NS 32  
DS 2  
SWH 8223.685 Hz  
FIDRES 0.125483 Hz  
AQ 3.9846387 sec  
RG 71.8  
DW 60.800 usec  
DE 6.50 usec  
TE 298.0 K  
D1 1.00000000 sec  
TD0 1

===== CHANNEL f1 =====  
NUC1 1H  
P1 14.07 usec  
PL1 0.30 dB  
PL1W 11.25229836 W  
SFO1 400.1324710 MHz  
SI 32768  
SF 400.1300000 MHz  
WDW EM  
SSB 0  
LB 0.30 Hz  
GB 0  
PC 1.00

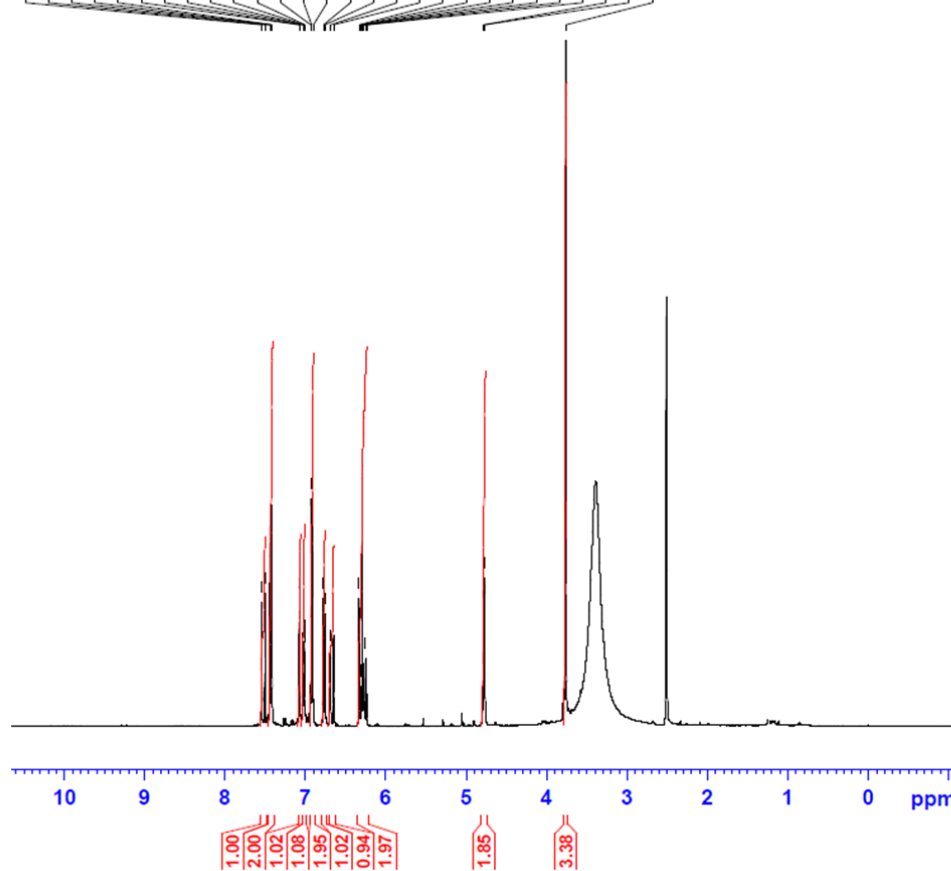

**<sup>13</sup>C NMR**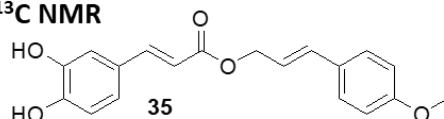

166.85  
159.62  
148.98  
146.06  
145.81  
133.56  
129.06  
128.31  
125.93  
121.96  
121.90  
116.19  
115.23  
114.55  
114.25

64.96

55.58

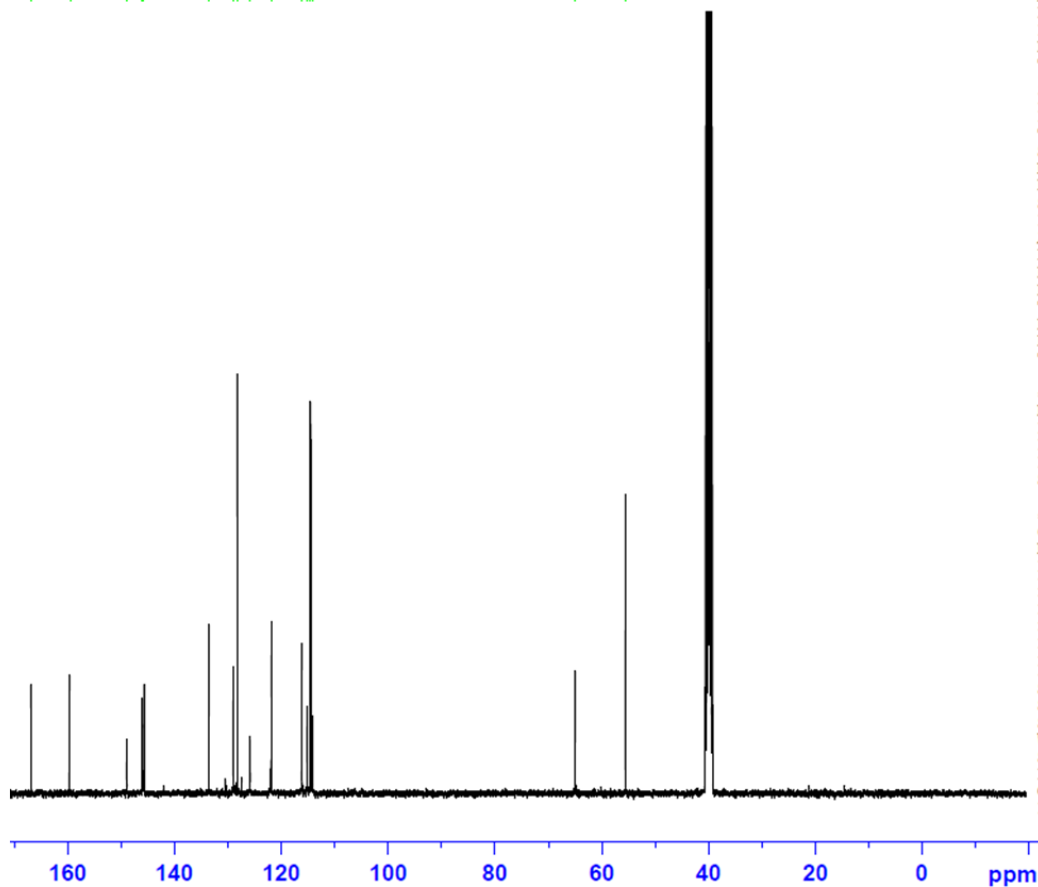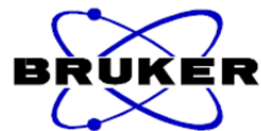

NAME Jeremie  
EXPNO 634  
PROCNO 1  
Date\_ 20120804  
Time 0.24  
INSTRUM spect  
PROBHD 5 mm PABBO BB-  
PULPROG zgpg30  
TD 65536  
SOLVENT DMSO  
NS 10000  
DS 4  
SWH 24038.461 Hz  
FIDRES 0.366798 Hz  
AQ 1.3631988 sec  
RG 203  
DW 20.800 usec  
DE 6.50 usec  
TE 298.0 K  
D1 2.00000000 sec  
D11 0.03000000 sec  
TD0 1

===== CHANNEL f1 =====  
NUC1 13C  
P1 9.90 usec  
PL1 -1.90 dB  
PL1W 56.02249908 W  
SFO1 100.6228298 MHz

===== CHANNEL f2 =====  
CPDPRG2 waltz65  
NUC2 1H  
PCPD2 80.00 usec  
PL2 0.30 dB  
PL12 15.40 dB  
PL13 18.40 dB  
PL2W 11.25229836 W  
PL12W 0.34772930 W  
PL13W 0.17427748 W  
SFO2 400.1316005 MHz  
SI 32768  
SF 100.6127690 MHz  
WDW EM  
SSB 0  
LB 1.00 Hz  
GB 0  
PC 1.40

<sup>1</sup>H NMR

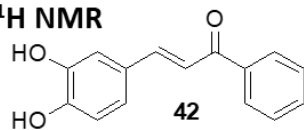

9.409  
9.348  
9.331  
8.113  
8.094  
7.670  
7.653  
7.634  
7.612  
7.580  
7.561  
7.542  
7.266  
7.203  
7.183  
6.829  
6.809

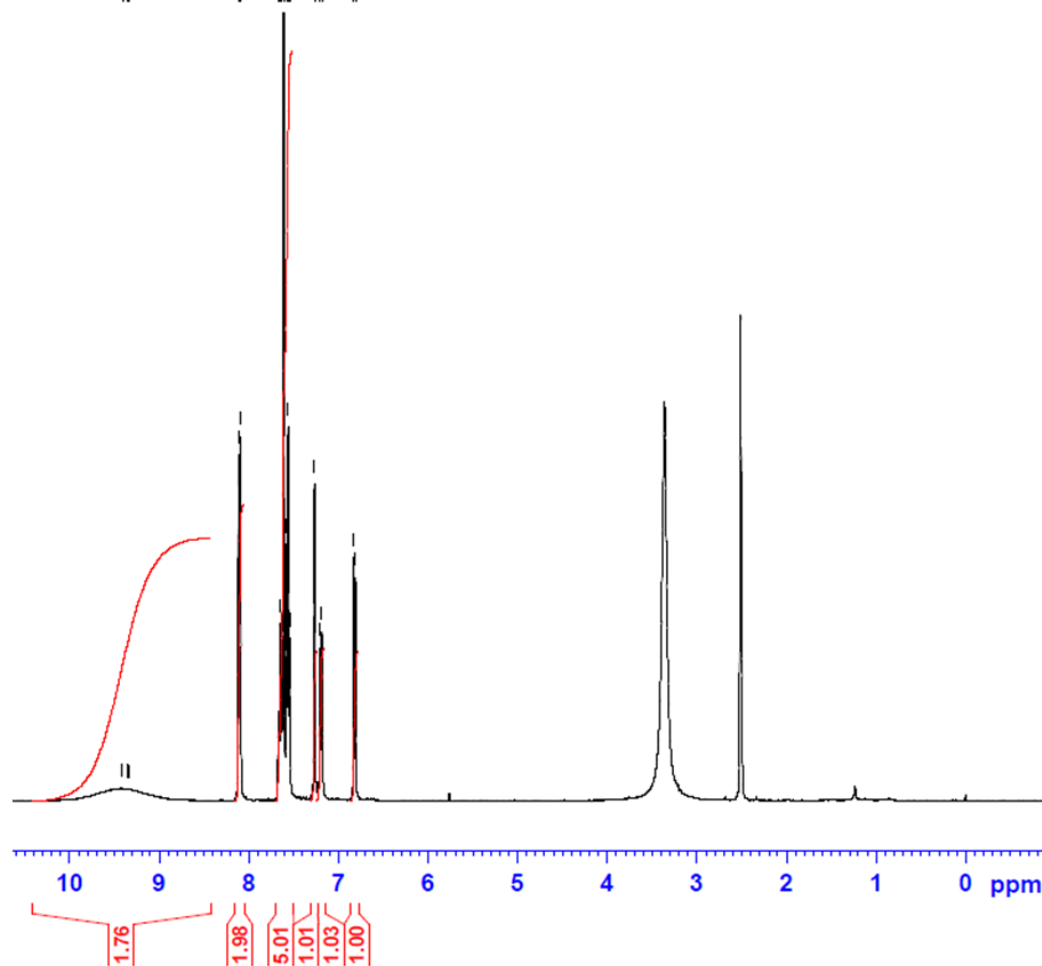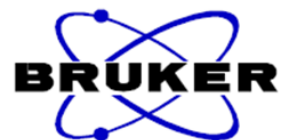

NAME Jeremie  
EXPNO 516  
PROCNO 1  
Date\_ 20120511  
Time 13.22  
INSTRUM spect  
PROBHD 5 mm PABBO BB-  
PULPROG zg30  
TD 65536  
SOLVENT DMSO  
NS 64  
DS 2  
SWH 8223.685 Hz  
FIDRES 0.125483 Hz  
AQ 3.9846387 sec  
RG 80.6  
DW 60.800 usec  
DE 6.50 usec  
TE 298.0 K  
D1 1.00000000 sec  
TD0 1

===== CHANNEL f1 =====  
NUC1 1H  
P1 14.07 usec  
PL1 0.30 dB  
PL1W 11.25229836 W  
SFO1 400.1324710 MHz  
SI 32768  
SF 400.1300000 MHz  
WDW EM  
SSB 0  
LB 0.30 Hz  
GB 0  
PC 1.00

**<sup>13</sup>C NMR**

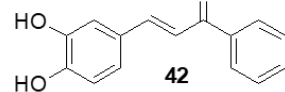

189.45  
149.25  
146.08  
145.45  
138.49  
133.23  
129.19  
128.76  
126.71  
122.69  
118.87  
116.22  
116.01

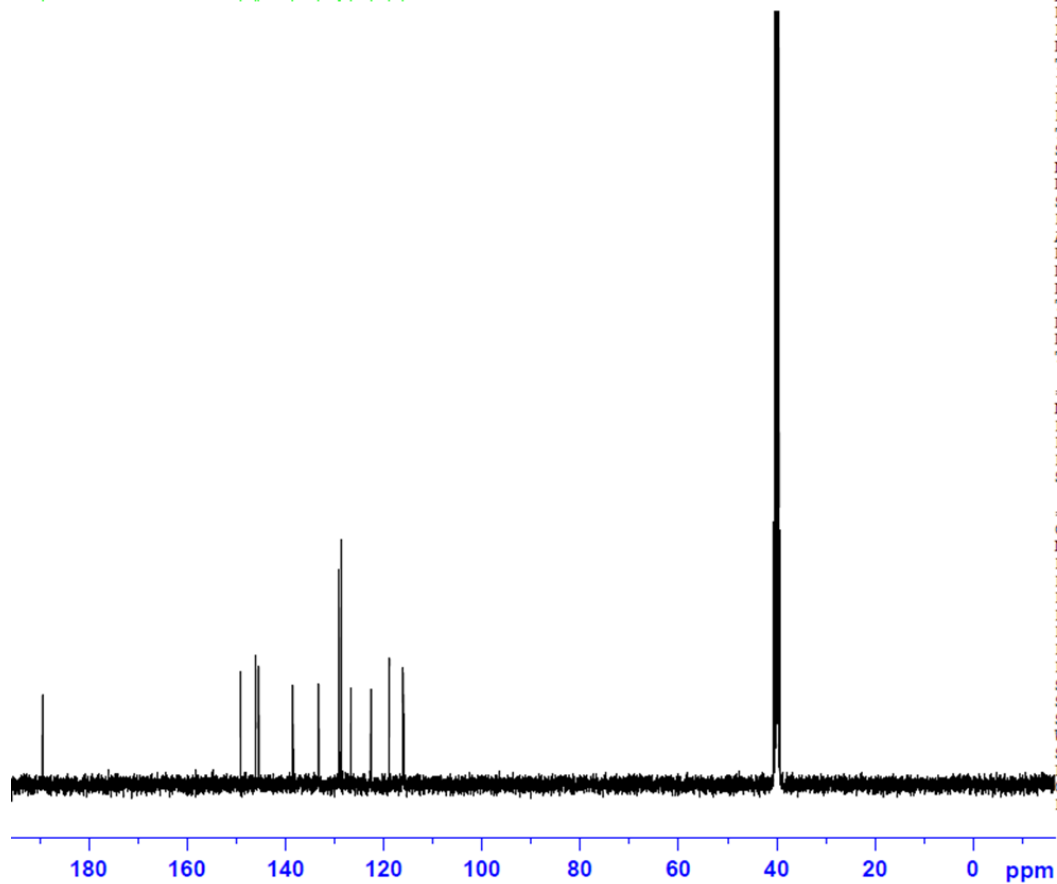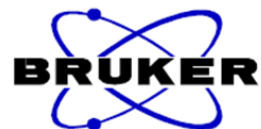

NAME Jeremie  
EXPNO 519  
PROCNO 1  
Date\_ 20120515  
Time 9.36  
INSTRUM spect  
PROBHD 5 mm PABBO BB-  
PULPROG zgpg30  
TD 65536  
SOLVENT DMSO  
NS 218  
DS 4  
SWH 24038.461 Hz  
FIDRES 0.366798 Hz  
AQ 1.3631988 sec  
RG 203  
DW 20.800 usec  
DE 6.50 usec  
TE 298.0 K  
D1 2.00000000 sec  
D11 0.03000000 sec  
TD0 1

===== CHANNEL f1 =====  
NUC1 13C  
P1 9.90 usec  
PL1 -1.90 dB  
PL1W 56.02249908 W  
SFO1 100.6228298 MHz

===== CHANNEL f2 =====  
CPDPRG2 waltz65  
NUC2 1H  
PCPD2 80.00 usec  
PL2 0.30 dB  
PL12 15.40 dB  
PL13 18.40 dB  
PL2W 11.25229836 W  
PL12W 0.34772930 W  
PL13W 0.17427748 W  
SFO2 400.1316005 MHz  
SI 32768  
SF 100.6127690 MHz  
WDW EM  
SSB 0  
LB 1.00 Hz  
GB 0  
PC 1.40

**<sup>1</sup>H NMR**

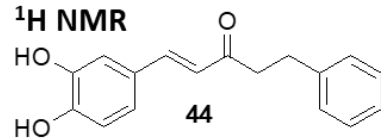

8.563  
8.279  
7.545  
7.504  
7.289  
7.278  
7.202  
7.194  
7.189  
7.181  
7.172  
7.169  
7.085  
7.079  
7.064  
7.059  
6.892  
6.872  
6.668  
6.627

2.999  
2.996  
2.984  
2.981  
2.963  
2.961  
2.949  
2.946

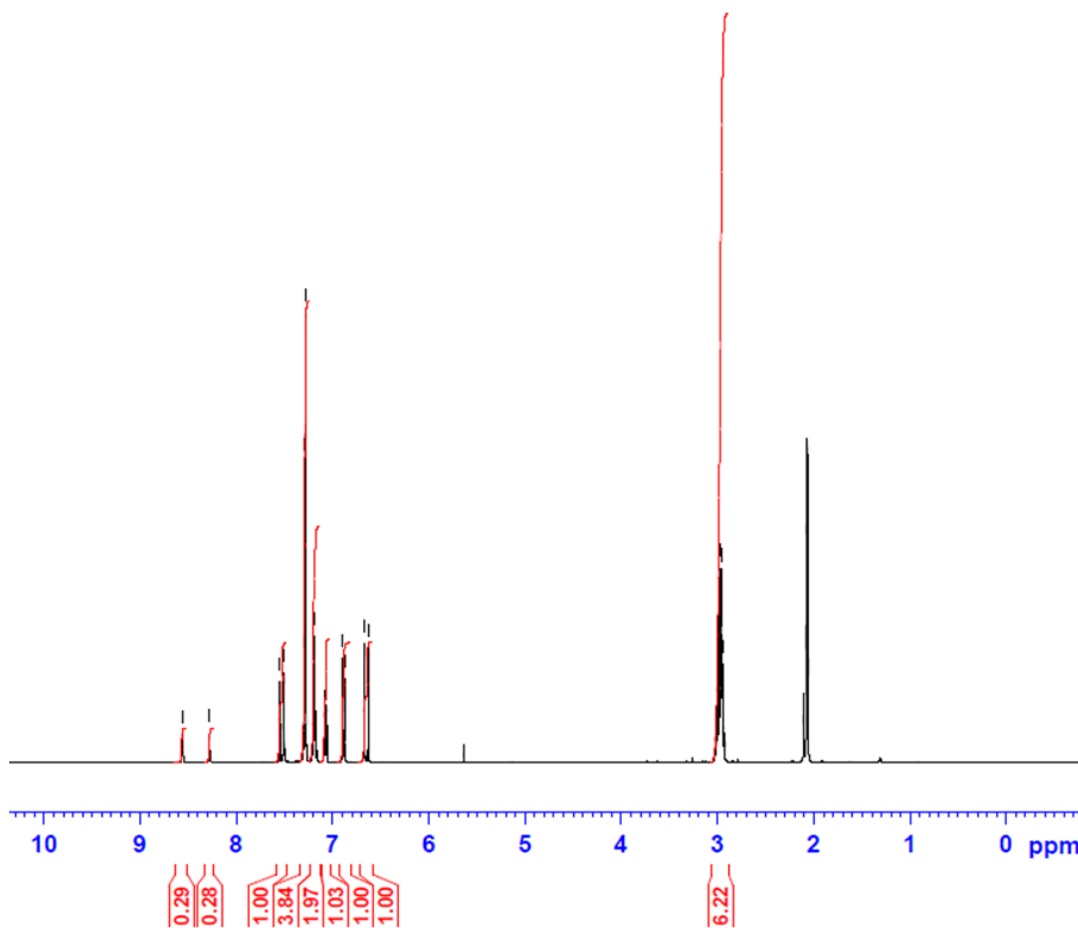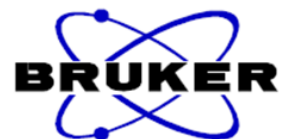

NAME Jeremie  
EXPNO 566  
PROCNO 1  
Date\_ 20120607  
Time\_ 14.19  
INSTRUM spect  
PROBHD 5 mm PABBO BB-  
PULPROG zg30  
TD 65536  
SOLVENT Acetone  
NS 32  
DS 2  
SWH 8223.685 Hz  
FIDRES 0.125483 Hz  
AQ 3.9846387 sec  
RG 90.5  
DW 60.800 usec  
DE 6.50 usec  
TE 298.0 K  
D1 1.00000000 sec  
TD0 1

===== CHANNEL f1 =====  
NUC1 1H  
P1 14.07 usec  
PL1 0.30 dB  
PL1W 11.25229836 W  
SFO1 400.1324710 MHz  
SI 32768  
SF 400.1300000 MHz  
WDW EM  
SSB 0  
LB 0.30 Hz  
GB 0  
PC 1.00

<sup>13</sup>C NMR

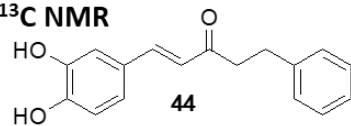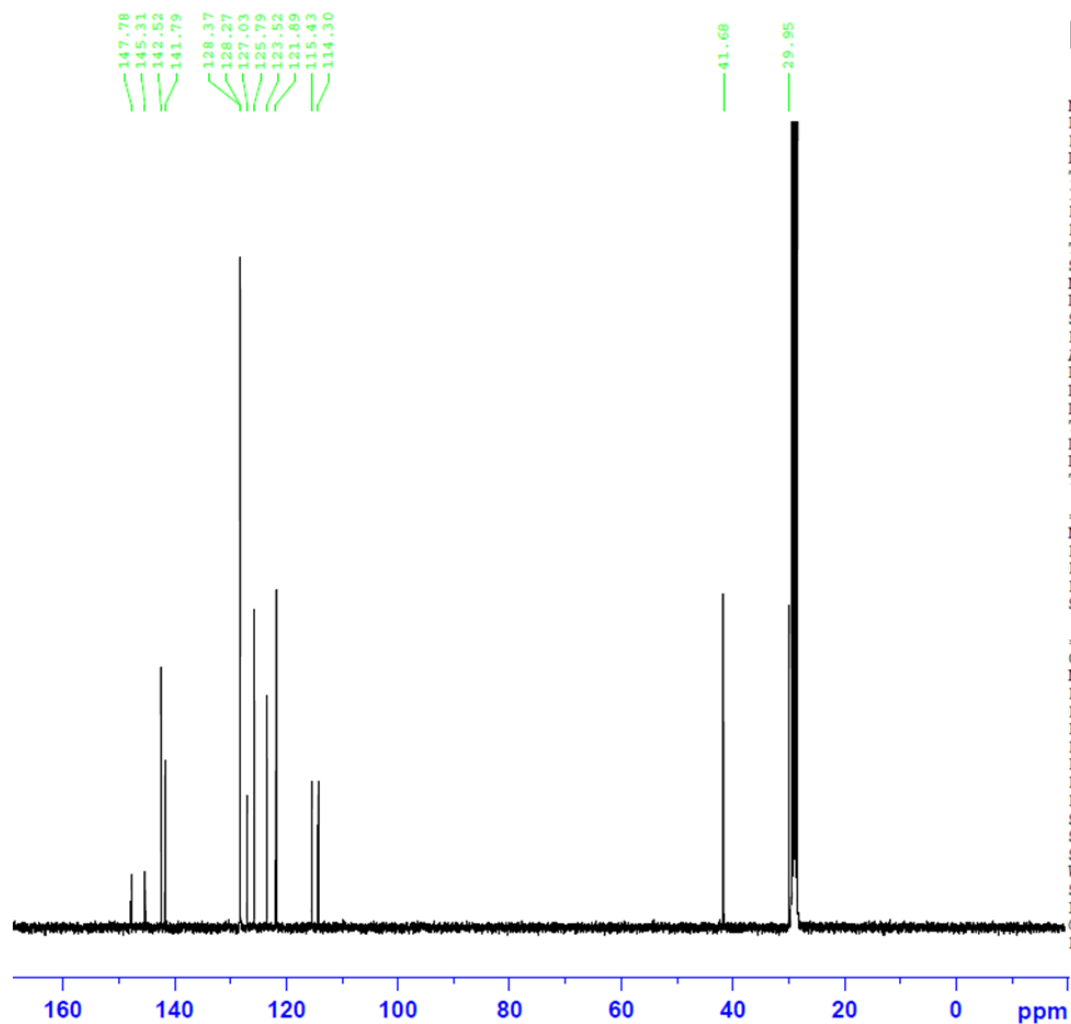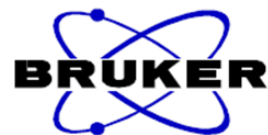

NAME Jeremie  
EXPNO 567  
PROCNO 1  
Date\_ 20120607  
Time 16.29  
INSTRUM spect  
PROBHD 5 mm PABBO BB-  
PULPROG zgpg30  
TD 65536  
SOLVENT Acetone  
NS 2131  
DS 4  
SWH 24038.461 Hz  
FIDRES 0.366798 Hz  
AQ 1.3631988 sec  
RG 203  
DW 20.800 usec  
DE 6.50 usec  
TE 298.0 K  
D1 2.00000000 sec  
D11 0.03000000 sec  
TD0 1

===== CHANNEL f1 =====  
NUC1 13C  
P1 9.90 usec  
PL1 -1.90 dB  
PL1W 56.02249908 W  
SFO1 100.6228298 MHz

===== CHANNEL f2 =====  
CPDPRG2 waltz65  
NUC2 1H  
PCPD2 80.00 usec  
PL2 0.30 dB  
PL12 15.40 dB  
PL13 18.40 dB  
PL2W 11.25229836 W  
PL12W 0.34772930 W  
PL13W 0.17427748 W  
SFO2 400.1316005 MHz  
SI 32768  
SF 100.6127690 MHz  
WDW EM  
SSB 0  
LB 1.00 Hz  
GB 0  
PC 1.40
